# Supplementary material
Source: Springer Nature journal article supplement (https://www.springermedizin.de/resource/supplementary/12950_2010_169_MOESM6_ESM.pdf/9558120)

### A: hMSCs Decrease Serum Levels of IL-1 $\beta$ in the Acute Asthma Model

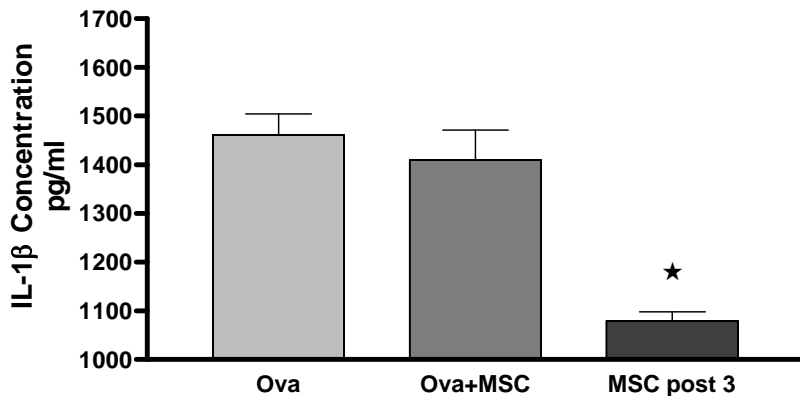

### B: hMSCs Increase Serum Levels of IFN $\gamma$

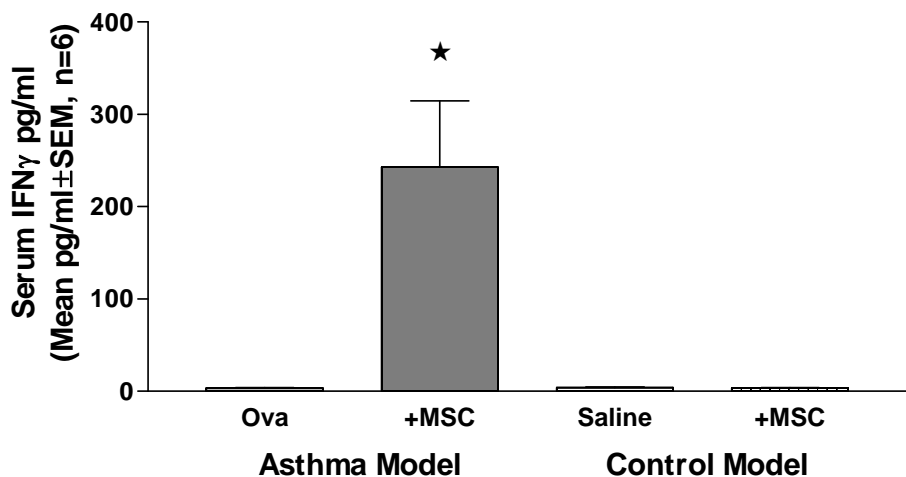

Supplement: MOESM6 [file 9558120]
